# Supplementary material for: Macromineral requirements for maintenance and growth in male and female hair sheep
Source: Front Vet Sci. 2023 Mar 2;10:1032429. doi: 10.3389/fvets.2023.1032429 (PMC10017769; doi:10.3389/fvets.2023.1032429)
Supplement: Supplementary file 1 [file Table_1.docx]

Supplementary Material

Macromineral requirements for maintenance and growth in male and female hair sheep

Caio J.L. Herbster1, Matheus L.C. Abreu2, Antonio S. Brito Neto1, Marcilio S. Mendes1, Luciano P. da Silva1, Marcos I. Marcondes3, Pedro H. S. Mazza4, Luciano S. Cabral2, Leilson R. Bezerra5, Ronaldo L. Oliveira4, Elzania S. Pereira1*

*** Correspondence:** Elzania S. Pereira elzania@hotmail.com

**Supplementary TABLE 1.** Mineral body composition of reference animals.

| **Study** | **BW (kg)** | **EBW (kg)** | **Ca (g)** | **P (g)** | **K (g)** | **Mg (g)** | **Na (g)** |
| --- | --- | --- | --- | --- | --- | --- | --- |
| **Non-Castrated males** |  |  |  |  |  |  |  |
| Pereira et al. (15) | 13.57 | 9.23 | 97.30 | 70.72 | 20.47 | 3.48 | 24.42 |
| Silva et al.(16) | 12.71 | 12.23 | 159.68 | 97.92 | 9.28 | 3.49 | 5.90 |
| Pereira et al.(18) | 13.53 | 10.44 | 118.35 | 55.85 | 22.57 | 2.91 | 15.17 |
| Pereira et al. (17) | 15.00 | 10.00 | 141.58 | 103.04 | 24.02 | 7.76 | 18.99 |
| Pereira et al. (5) | 15.74 | 10.80 | 135.36 | 103.44 | 23.70 | 6.11 | 18.20 |
| **Castrated males** |  |  |  |  |  |  |  |
| Cabral et al. (14) | 15.37 | 12.12 | 112 | 54.00 | 12.12 | 3.64 | 9.69 |
| Silva et al. (16) | 11.69 | 11.26 | 162.14 | 94.15 | 6.40 | 3.47 | 5.31 |
| Pereira et al. (5) | 14.70 | 10.88 | 138.57 | 101.51 | 24.17 | 6.56 | 19.43 |
| Pereira et al.(17) | 15.03 | 10.30 | 110.43 | 86.15 | 23.04 | 6.05 | 17.13 |
| **Females** |  |  |  |  |  |  |  |
| Silva et al.(16) | 10.55 | 9.88 | 119.98 | 73.09 | 5.69 | 2.77 | 4.38 |
| Pereira et al. (5) | 15.60 | 11.10 | 170.33 | 103.23 | 20.80 | 7.00 | 18.85 |

*BW, Body weight; EBW, empty body weight*
